# Supplementary material for: Fast Gelation of Poly(ionic liquid)-Based Injectable Antibacterial Hydrogels
Source: MDPI journal article supplement (doi:10.3390/gels8010052), 2022-01-12
Supplement: s1 [file s1]

Supplementary

# Fast Gelation of Poly(ionic liquid)-Based Injectable Antibacterial Hydrogels

Che Zhao <sup>1</sup>, Chengju Sheng <sup>2,\*</sup> and Chao Zhou <sup>3,\*</sup>

<sup>1</sup> School of Aerospace and Mechanical Engineering, Changzhou Institute of Technology, Changzhou 213032, China; zhaoche@czu.cn

<sup>2</sup> School of Chemistry and Chemical Engineering, Southwest University, Chongqing 400715, China

<sup>3</sup> Institute of Biomedical Engineering and Health Sciences, Changzhou University, Changzhou 213164, China

\* Correspondence: scj1995@email.swu.edu.cn (C.S.); zhouchao@cczu.edu.cn (C.Z.).

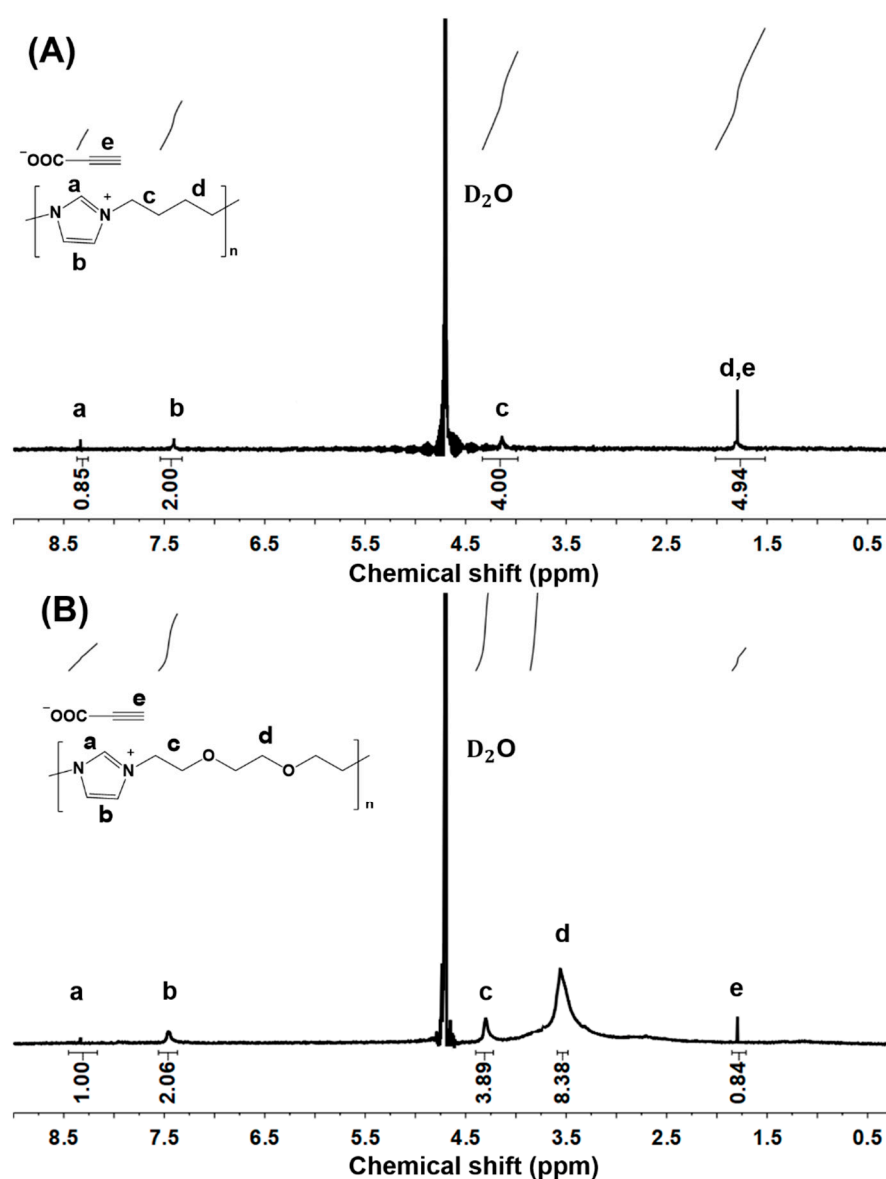

**Figure S1.**  $^1\text{H}$  NMR (500 MHz,  $\text{D}_2\text{O}$ ) of (A) PBP a 8.3 (d,  $-\text{N}=\text{CH}=\text{CN}^+$ ), b 7.48 (d,  $\text{N}-\text{CH}=\text{CH}-\text{N}^+$ ), c 4.25 (d,  $\text{N}^+-\text{CH}_2-\text{CH}_2-\text{CH}_2-\text{CH}_2$ ), d,e 1.74 (s,  $\text{COOH}-\text{C}\equiv\text{CH}$ ), 1.75 (m,  $\text{N}^+-\text{CH}_2-\text{CH}_2-\text{CH}_2-\text{CH}_2$ ) and (B) PDP a 8.3 (d,  $-\text{N}=\text{CH}=\text{CN}^+$ ), b 7.48 (d,  $\text{N}-\text{CH}=\text{CH}-\text{N}^+$ ), c 4.25 (dd,  $\text{N}^+-\text{CH}_2-\text{CH}_2-\text{O}$ ), d 3.55–3.75 (m,  $\text{CH}_2-\text{O}-\text{CH}_2-\text{CH}_2-\text{O}-\text{CH}_2-\text{CH}_2$ ) and e 1.74 (s,  $\text{COOH}-\text{C}\equiv\text{CH}$ ).

**Citation:** Zhao, C.; Sheng, C.; Zhou, C. Fast Gelation of Poly(ionic liquid)-Based Injectable Antibacterial Hydrogels. *Gels* **2022**, *8*, 52. <https://doi.org/10.3390/gels8010052>

Academic Editor: Rama Bansil

Received: 13 December 2021

Accepted: 9 January 2022

Published: 12 January 2022

**Publisher’s Note:** MDPI stays neutral with regard to jurisdictional claims in published maps and institutional affiliations.

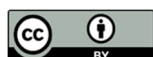

**Copyright:** © 2022 by the authors.  
Submitted for possible open access  
publication under the terms and  
conditions of the Creative Commons  
Attribution (CC BY) license  
(<https://creativecommons.org/licenses/by/4.0/>).

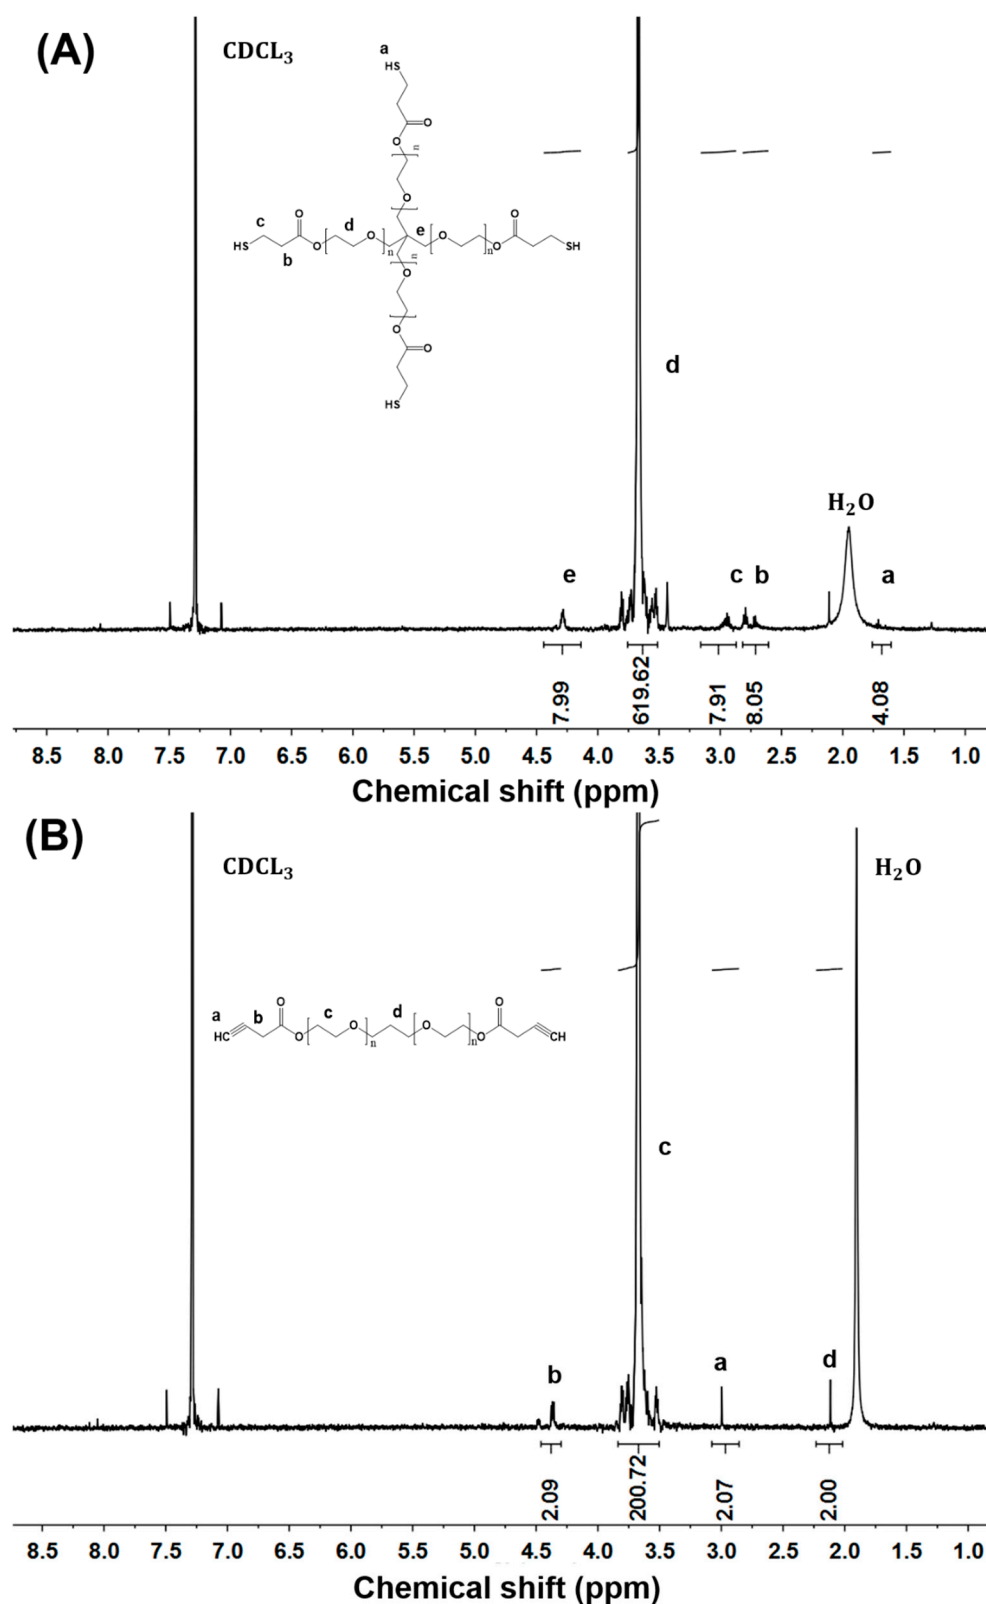

**Figure S2.**  $^1\text{H}$  NMR (500 MHz,  $\text{CDCl}_3$ ) of (A) 4 arm PEG-SH a 1.70 (s, S-H), b 2.66 (s, O=C-CH<sub>2</sub>), c 2.85 (d, CH<sub>2</sub>-SH), d 3.57–3.70 (m, CH<sub>2</sub>-CH<sub>2</sub>-O), e 4.26 (s, O-CH<sub>2</sub>) and (B) PEG-Alkynyl a 1.12 (s, CH<sub>2</sub>-CH<sub>2</sub>-CH<sub>2</sub>), b 3.01 (s, C≡CH), c 3.57–3.70 (m, CH<sub>2</sub>-CH<sub>2</sub>-O), d 4.26 (s, CH<sub>2</sub>-C=O).

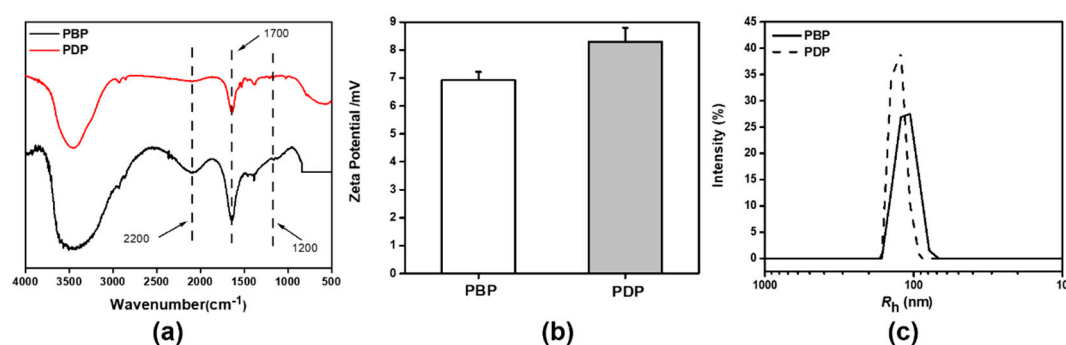

**Figure S3.** Characterization of poly(ionic liquids) (a) FTIR of PBP and PDP; (b) zeta potential of PBP and PDP and (c) nano particle size of PBP and PDP.

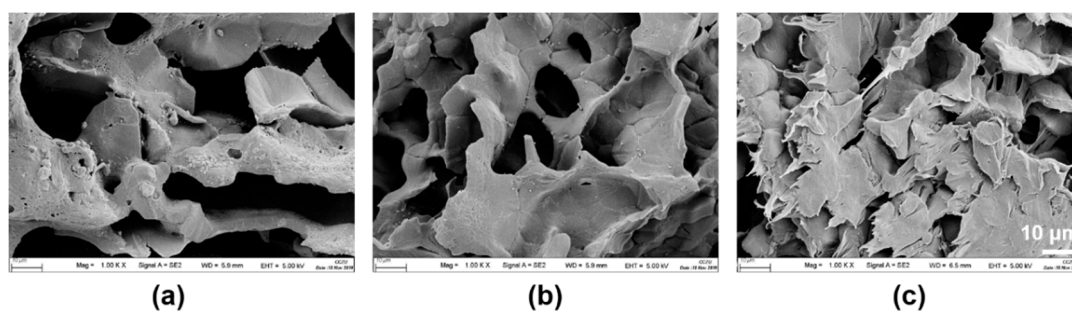

**Figure S4.** Surface morphology of (a) HN; (b) HB; (c) HD by FE-SEM; the scale bars are 10  $\mu\text{m}$ .

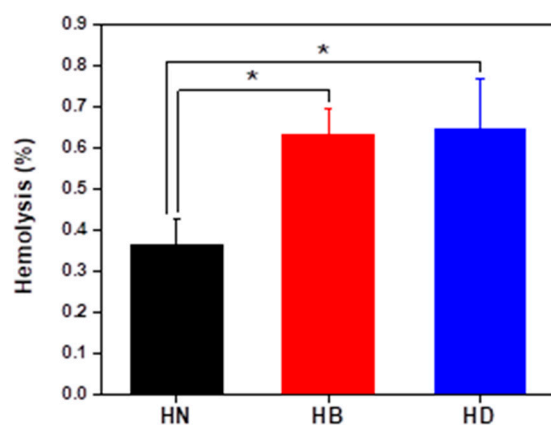

**Figure S5.** Hemolysis of hydrogels ( $n = 4$ , \* means  $P \leq 0.5$ ).

**Table S1.** Swelling characteristics and crosslinking density of injectable hydrogels in PBS (pH = 7.4) at 37  $^{\circ}\text{C}$ .

| Samples | Swelling Ration (%) | Crosslinking Density (mol/cm <sup>3</sup> ) |
|---------|---------------------|---------------------------------------------|
| HN      | 754                 | 0.13                                        |
| HB      | 421                 | 0.41                                        |
| HD      | 373                 | 0.52                                        |

**Table S2.** Antibacterial and cell viability of PBP and PDP.

| Samples | MIC ( $\mu\text{g/mL}$ ) |                  | Cell Viability (%) |
|---------|--------------------------|------------------|--------------------|
|         | <i>E. coli</i>           | <i>S. aureus</i> |                    |
| PBP     | 250                      | 125              | 90.2               |
| PDP     | 62.5                     | 25               | 91.3               |
